# Supplementary material
Source: publisher figshare collection journal article supplement (https://asha.figshare.com/articles/dataset/_/20669214)
Supplement: Supplementary file 1 [file 1]

## Figure S2

### *Stimuli Used in the Mutual Exclusivity Part*

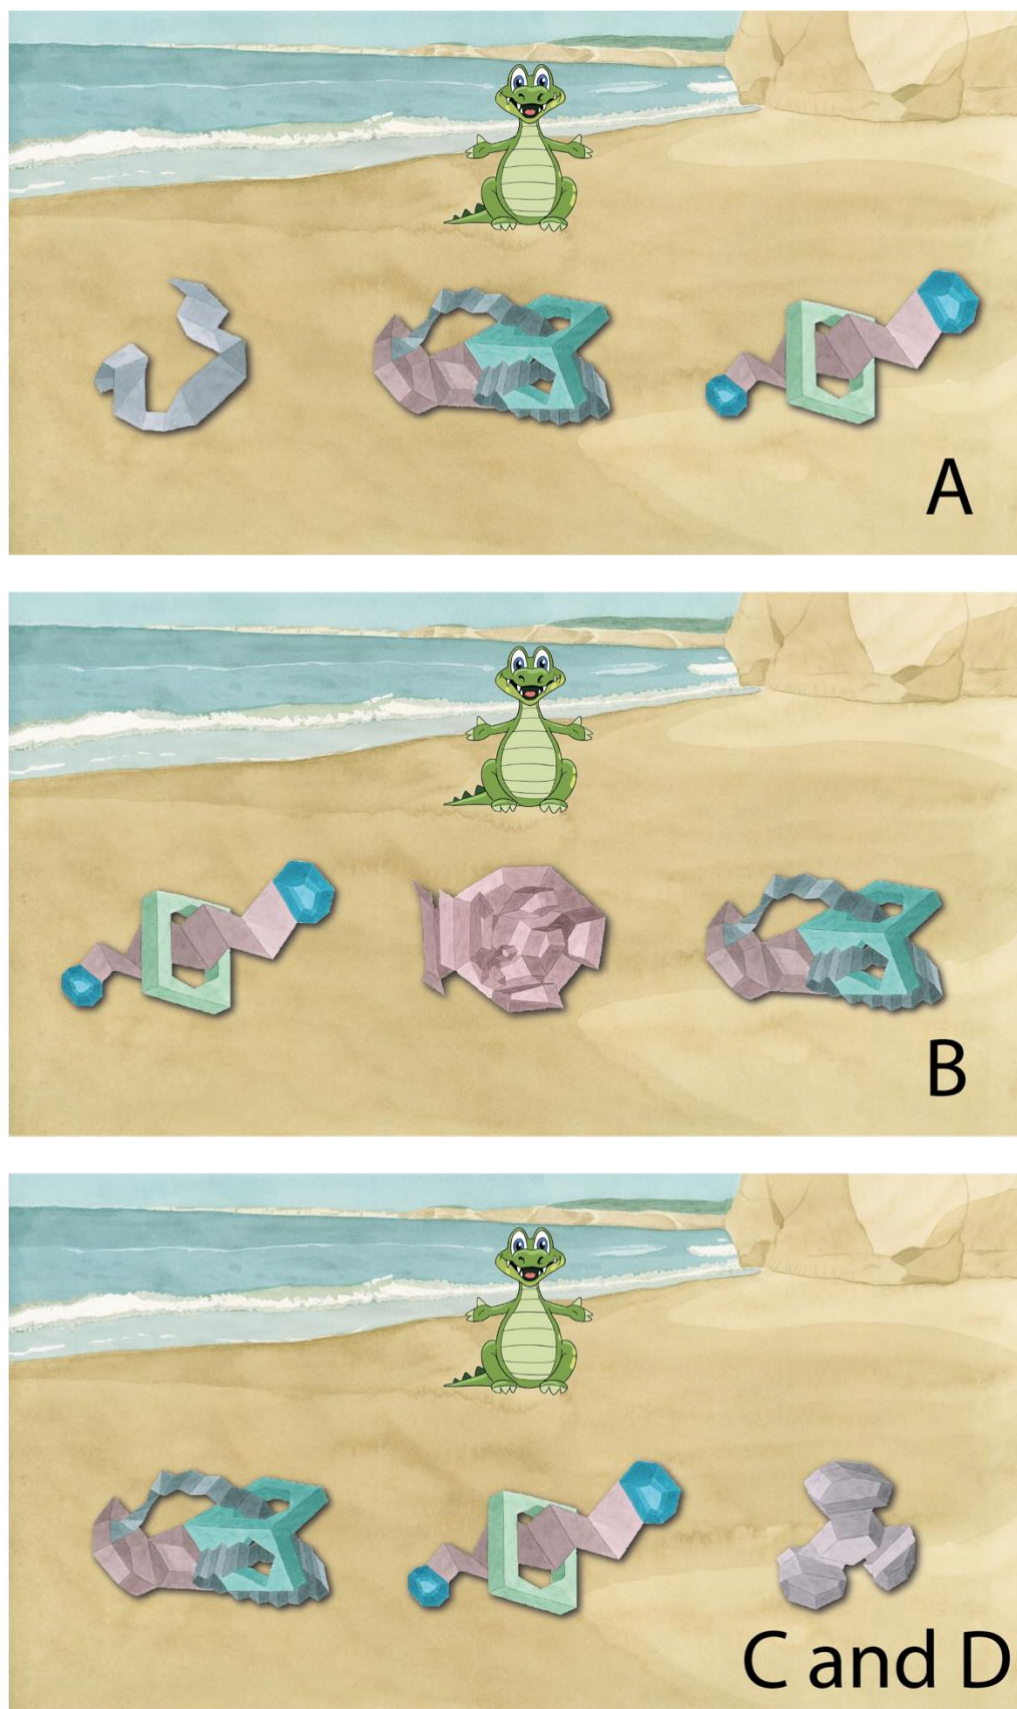

**A :**

*TU : Bana şimdi lütfen patoyu ver ! Patoya işaret et !*

*GER: Gib mir jetzt bitte das Pato! Zeige auf das Pato!*

*BS: Gib mir jetzt bitte s'Pato! Zeig uf s'Pato!*

*BE: Gib mir itz bitte ds Pato! Zeig ufs Pato!*

*FR : S'il te plaît, donne-moi maintenant le Pato ! Montre le Pato !*

*IT : Per favore, passami il Pato ora! Indica il Pato!*

**B :**

*TU : Ve şimdi bana lütfen kebiyi ver! Kebize işaret et!*

*GER: Und jetzt gib mir jetzt bitte das Kebi! Zeige auf das Kebi!*

*BS: Und jetzt gib mir bitte s'Kebi! Zeig uf s'Kebi !*

*BE: Und itz gib mir bitte ds Kebi! Zeig ufs Kebi !*

*FR : Et maintenant, s'il te plaît, donne-moi le Kébi ! Montre le Kébi !*

*IT : E ora, per favore, passami il chebi! Indica il chebi!*

**C :**

*TU : Bana şimdi lütfen nubayı ver! Nubaya işaret et !*

*GER: Gib mir jetzt bitte das Nuba! Zeige auf das Nuba!*

*BS: Gib mir jetzt bitte s'Nuba! Zeig uf s'Nuba!*

*BE: Gib mir itz bitte z Nuba! Zeig ufs Nuba !*

*FR : S'il te plaît, donne-moi maintenant le Nouba ! Montre le Nouba !*

*IT : Per favore, passami il Nuba ora! Indica il Nuba !*

---
