# Supplementary material
Source: publisher figshare collection journal article supplement (https://asha.figshare.com/articles/dataset/_/20669214)
Supplement: Supplementary file 2 [file 1]

## Figure S1

### *Stimuli Used in the Fast Mapping Part*

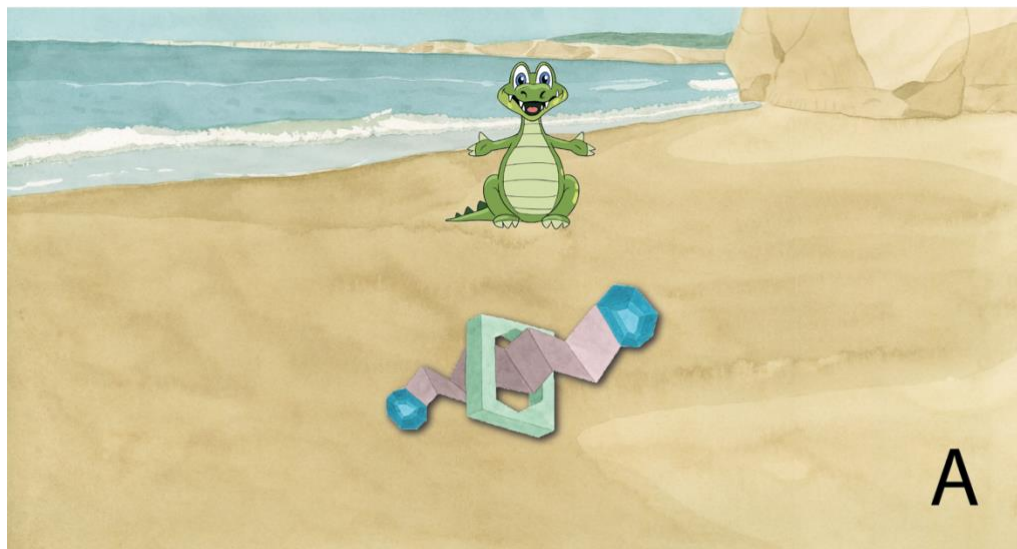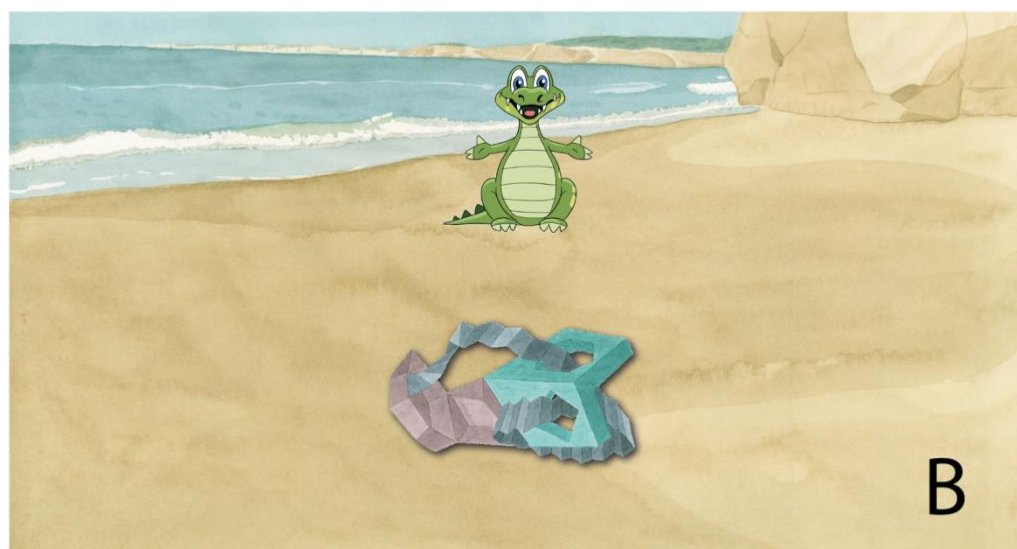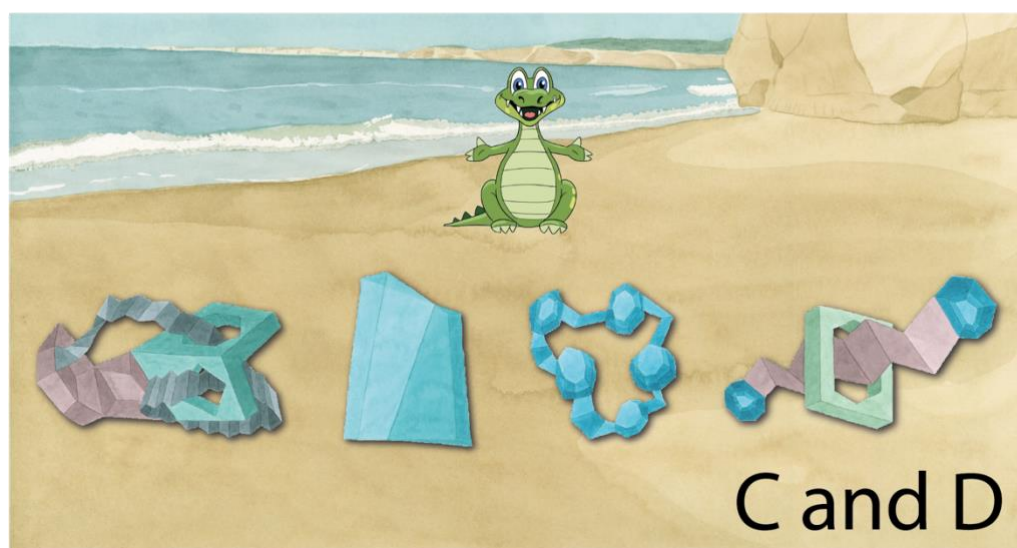

**A :**

*TU : Bak, bu bir Deti. Deti harikadır! Ben Deti'yle oynamayı gerçekten seviyorum.*

*GER: Schau mal, das ist ein Deti. Das Deti ist toll! Ich spiele wirklich gerne mit dem Deti.*

*BS: Lueg emol, das isch es Deti. S'Deti ist toll! Ich spiel würklich gärn mit em Deti.*

*BE: Lueg mau, das isch äs Deti. Ds Deti isch mega cool. Ig spilä würkläch mega gärn mit em Deti.*

*FR : Regarde, ceci est un Déti. Le Déti est chouette ! J'aime beaucoup jouer avec le Déti.*

*IT : Guarda, questo è un Déti. Il Déti è troppo bello! Mi piace molto giocare con il Déti.*

**B:**

*TU: Ve bu da Dapu. Dapuyu da seviyorum. Dapu çok hoşuma gidiyor.*

*GER: Und hier ist das Dapu. Ich mag das Dapu auch sehr. Das Dapu gefällt mir richtig gut.*

*BS: Und do isch e Dapu. Ich ha s'Dapu au sehr gärn. S'Dapu gfallt mr richtig guet.*

*BE: Und hie isch ds Dapu. Ig ha ds Dapu ou sehr gärn. Ds Dapu gfaut mir sehr guet.*

*FR : Et ceci est un Dapou. J'aime beaucoup le Dapou, aussi. Le Dapou me plaît vraiment beaucoup.*

*IT : E questo qui è un Dapu. Anche il Dapu mi piace molto. Il Dapu mi piace proprio tanto.*

**C :**

*TU : Bana lütfen detiyi verebilir misin? Lütfen detiye işaret et.*

*GER: Kannst du mir bitte das Deti geben? Zeig bitte auf das Deti.*

*BS: Kasch du mr bitte s'Deti geh? Zeig bitte uf s'LDeti.*

*BE: Chasch du mir bitte z Deti gä? Zeig bitte ufs Deti.*

*FR : Peux-tu me donner le Déti, s'il te plaît ? S'il te plaît, montre le Déti.*

*IT : Puoi passarmi il Déti, per favore? Per favore, indica il Déti.*

**D :**

*TU : Şimdi bana lütfen dapuyu verebilir misin? Lütfen dapuya işaret et.*

*GER: Kannst du mir jetzt bitte das Dapu geben? Zeig bitte auf das Dapu.*

*BS: Kasch du mir jetzt bitte s'Dapu geh? Zeig bitte uf s'Dapu.*

*BE: Chasch du mir iz bitte ds Dapu gä? Zeig bitte ufs Dapu.*

*FR : S'il te plaît, peux-tu me donner le Dapou maintenant ? S'il te plaît, montre le Dapou.*

*IT : Per favore, mi puoi passare il Dapu ora? Per favore, indica il Dapu.*

---
